# Supplementary material for: Melatonin Reduces GSK3β-Mediated Tau Phosphorylation, Enhances Nrf2 Nuclear Translocation and Anti-Inflammation
Source: PubMed Central journal article supplement — ASN Neuro. 2020 Dec 20;12:1759091420981204. doi: 10.1177/1759091420981204 (PMC7754800; doi:10.1177/1759091420981204), 2020-12-20
Supplement: sj-pdf-1-asn-10.1177_1759091420981204.pdf [file sj-pdf-1-asn-10.1177_1759091420981204.pdf]

# **Melatonin reduces GSK3 $\beta$ -mediated Tau phosphorylation, enhances Nrf2 nuclear translocation and anti-inflammation**

**Rashmi Das<sup>12@</sup>, Abhishek Ankur Balmik<sup>12@</sup>, Subashchandraboze Chinnathambi<sup>§12</sup>**

<sup>1</sup>Neurobiology Group, Division of Biochemical Sciences, CSIR-National Chemical Laboratory,  
Dr. Homi Bhabha Road, 411008 Pune, India

<sup>2</sup>Academy of Scientific and Innovative Research (AcSIR), 411008 Pune, India

@The authors wish it to be known that, in their opinion, the first two authors should be regarded as joint First Authors.

§To whom correspondence should be addressed: **Prof. Subashchandraboze Chinnathambi**, Neurobiology group, Division of Biochemical Sciences, CSIR-National Chemical Laboratory (CSIR-NCL), Dr. Homi Bhabha Road, 411008 Pune, India, Telephone: +91-20-25902232, Fax. +91-20-25902648. Email: [s.chinnathambi@ncl.res.in](mailto:s.chinnathambi@ncl.res.in)

## Supplementary Figure 1

### Phase contrast study and aggregation of Tau

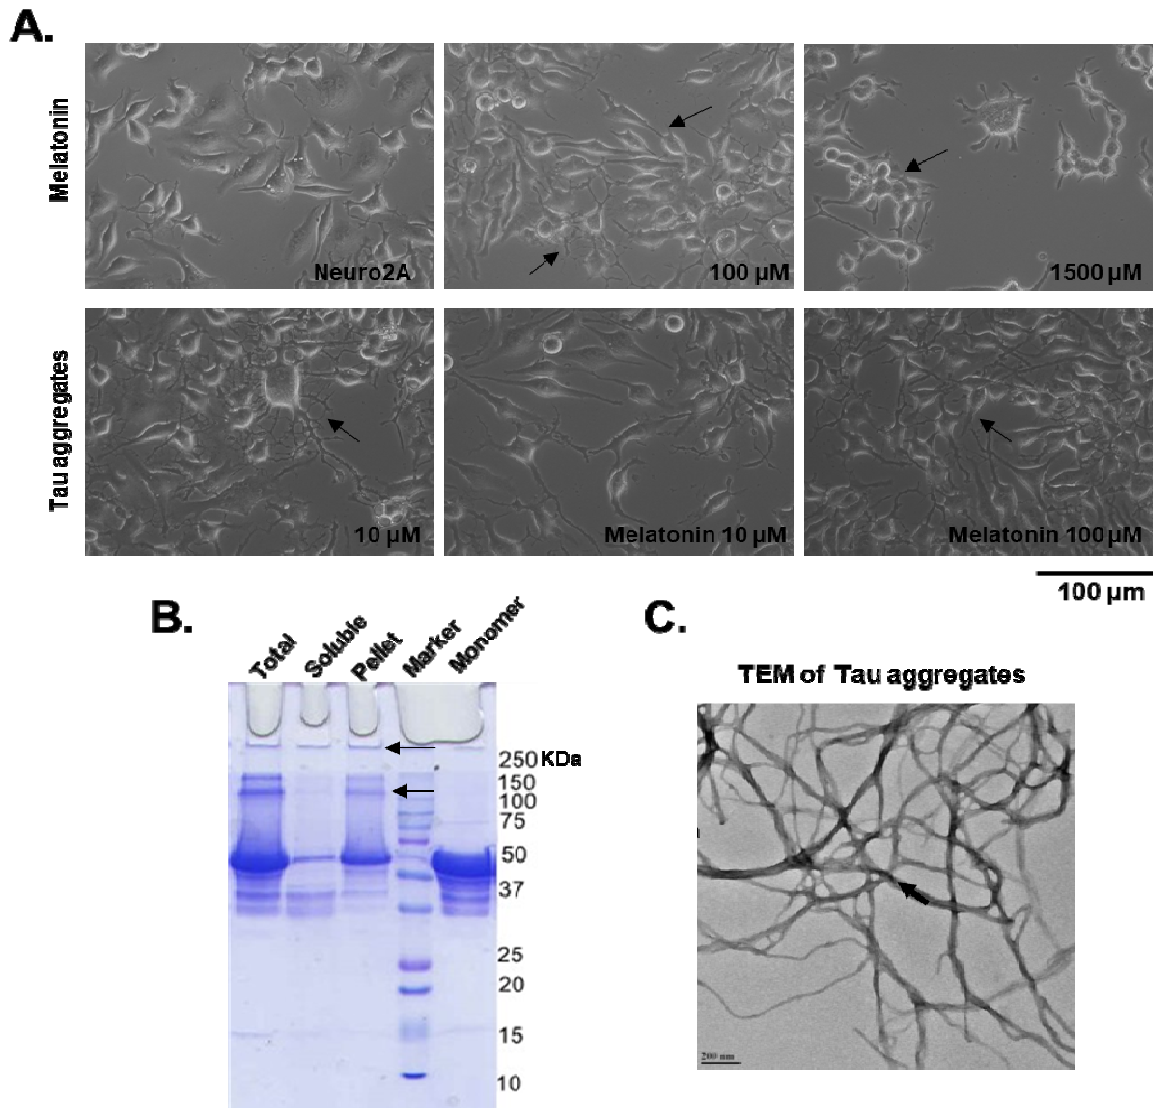

**Supplementary Fig. 1. Phase contrast study of Neuro2A cell morphology and SDS-TEM analysis of Tau aggregates.** (A) Cells were found to maintain neuronal connection at 100  $\mu$ M concentration of Melatonin whereas at higher concentration of 1500  $\mu$ M, cell toxicity was observed as indicated by arrow. The cell viability assay of Melatonin in presence of Tau aggregates was validated by phase contrast study. (B, C) Pre-formed Tau aggregates were analyzed by SDS-PAGE. Higher order aggregates are pointed by 'arrow' on SDS-PAGE and TEM images. On SDS-PAGE, the fractions of pelleting assay were loaded and indicated as Total without pelleting assay, Supernatant, Pellet.

## Supplementary Figure 2

Level of pGSK3 $\beta$  (pS9) and total GSK3 $\beta$  in Neuro2A cells

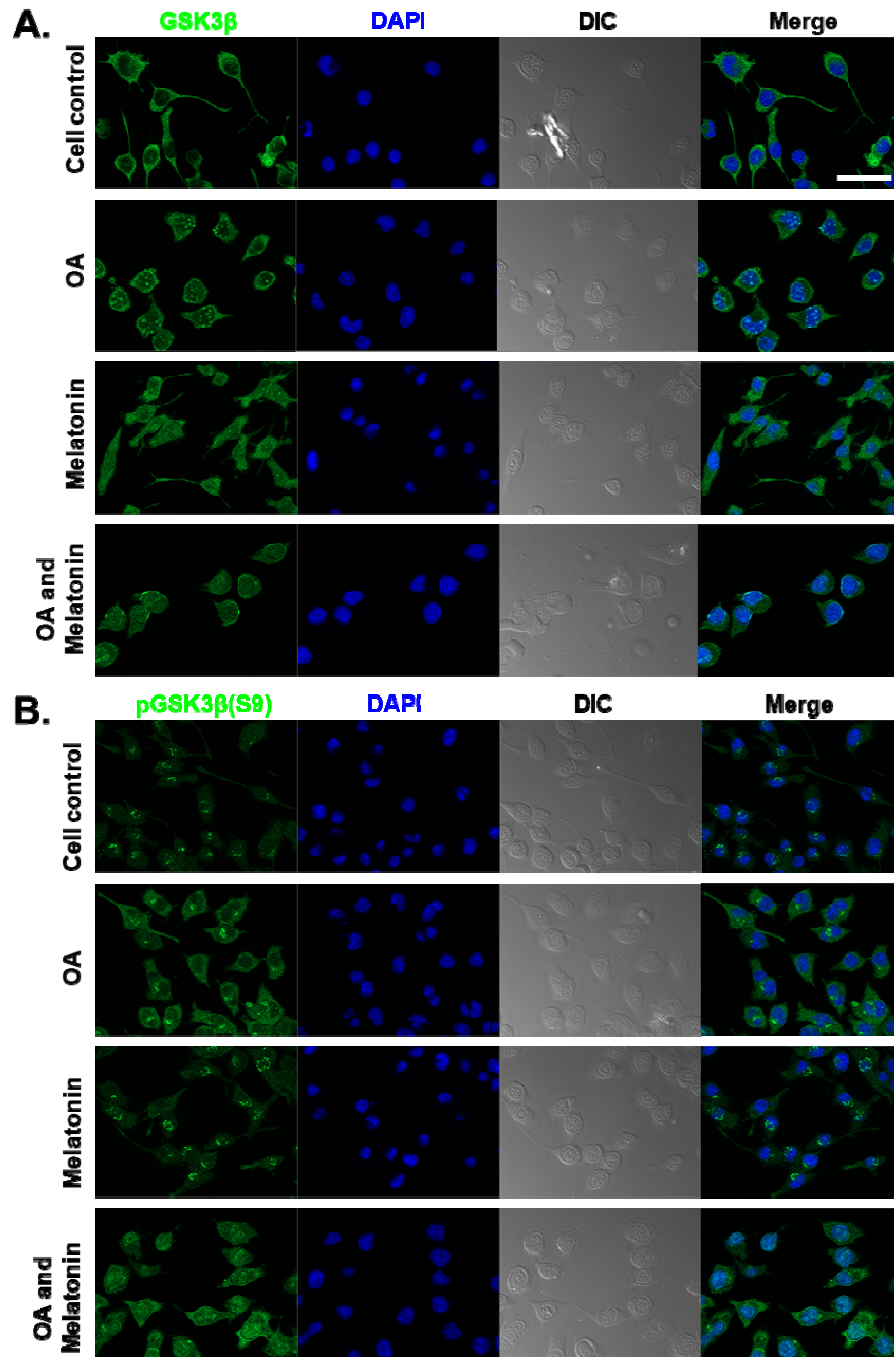

**Supplementary Fig. 2. Immunofluorescence study of Neuro2A for GSK3 $\beta$  and pGSK3 $\beta$  (Ser<sup>9</sup>) expression . (A)** The cellular level of GSK3 $\beta$  and pGSK3 $\beta$  were observed in Melatonin and OA treated cells, where it was observed that total GSK3 $\beta$  level was reduced by Melatonin treatment but pGSK3 $\beta$  (Ser<sup>9</sup>) level remain insignificant compared to OA-stress. The scale bar is 50  $\mu$ m.

### Supplementary Figure 3

Melatonin reduces OA-induced Tau phosphorylation

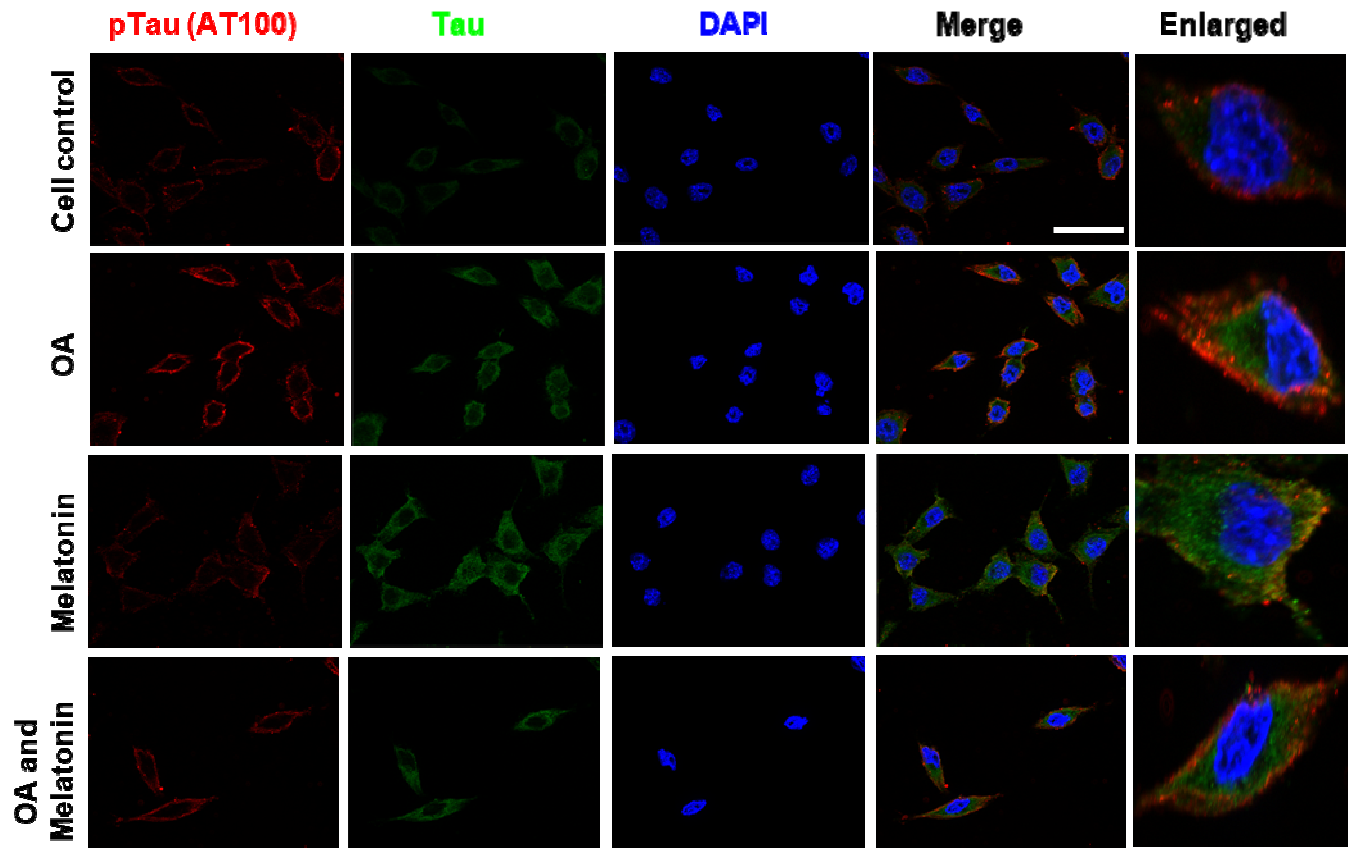

**Supplementary Fig. 3. Immunofluorescence study of phospho-Tau level (AT100) on Neuro2A cells .** The level of phospho-Tau (AT100) was observed in Melatonin and OA treated cells, where pTau was found to be localized at the periphery of the cells as neuronal puncta. The OA treated group showed more accumulation of AT100-Tau which was reduced by Melatonin treatment. The scale bar is 50  $\mu$ m.
